# Supplementary material for: New Insights of Infiltration Process of Argyrodite Li6PS5Cl Solid Electrolyte into Conventional Lithium-Ion Electrodes for Solid-State Batteries
Source: MDPI journal article supplement (doi:10.3390/batteries9100503), 2023-10-04

# Supplementary Information

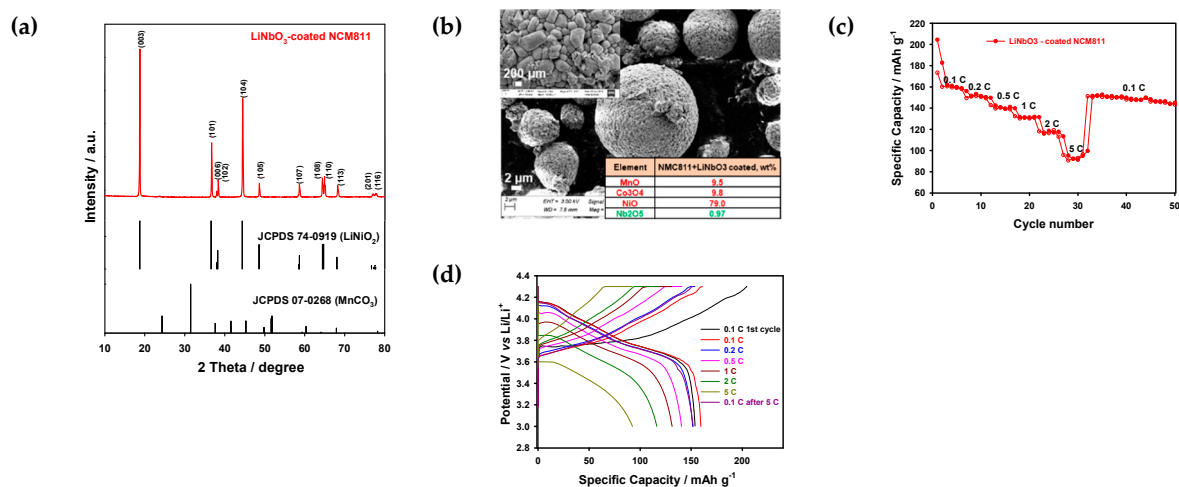

**Figure S1.** (a) XRD pattern and (b) SEM and XRF of the NCM811 coated via LiNbO<sub>3</sub> powder. (c) Rate capabilities and (d) voltage curves of the NCM811 coated LiNbO<sub>3</sub> electrode tested in the liquid electrolyte of 1 M LiPF<sub>6</sub> in EC DEC (1:1 v/v) in the potential range of 3.0–4.3 V (vs. Li/Li<sup>+</sup>) at various current densities at room temperature.

The NCM cathodes were prepared by blending the obtained powder (LiNi<sub>0.8</sub>Co<sub>0.1</sub>Mn<sub>0.1</sub>O<sub>2</sub> coated by LiNbO<sub>3</sub> 1 wt%, NEI corp) (92 wt%), polyvinylidene fluoride (Sigma-Aldrich) binder (4 wt%), and carbon black (Super C65, Imerys) conductor (4 wt%) in N-methyl pyrrolidone (NMP, Sigma-Aldrich) via an automatic mixing machine (THINKY MIXER, ARE-250) to obtain a uniformly mixed slurry and cast onto aluminum foil and dried at 120°C for 10 min to eliminate the NMP solvent; the electrode sheets were pressed to ensure interparticle contact and reduce the porosity of the electrode, and then dried at 120°C for overnight in a vacuum oven. The active material of NCM cathodes as a working electrode, Li-metal foil as a counter electrode, and polypropylene as the separator (Celgard 2500) were chosen as the conventional liquid electrolyte of 1 M LiPF<sub>6</sub> in EC DEC 1/1 v/v (Aldrich). The charge–discharge tests of NCM cathodes/Li cells were conducted using CR2016 coin-type cells fabricated in an argon-filled glove box. The electrochemical tests were performed at room temperature. The cycling performance was investigated by a MACCOR tester battery cycler in a potential range of 3.0–4.3 V at different C-rates (0.05 C, 0.1 C, 0.2 C, and 0.5 C) applied to cells to evaluate C-rate performance.

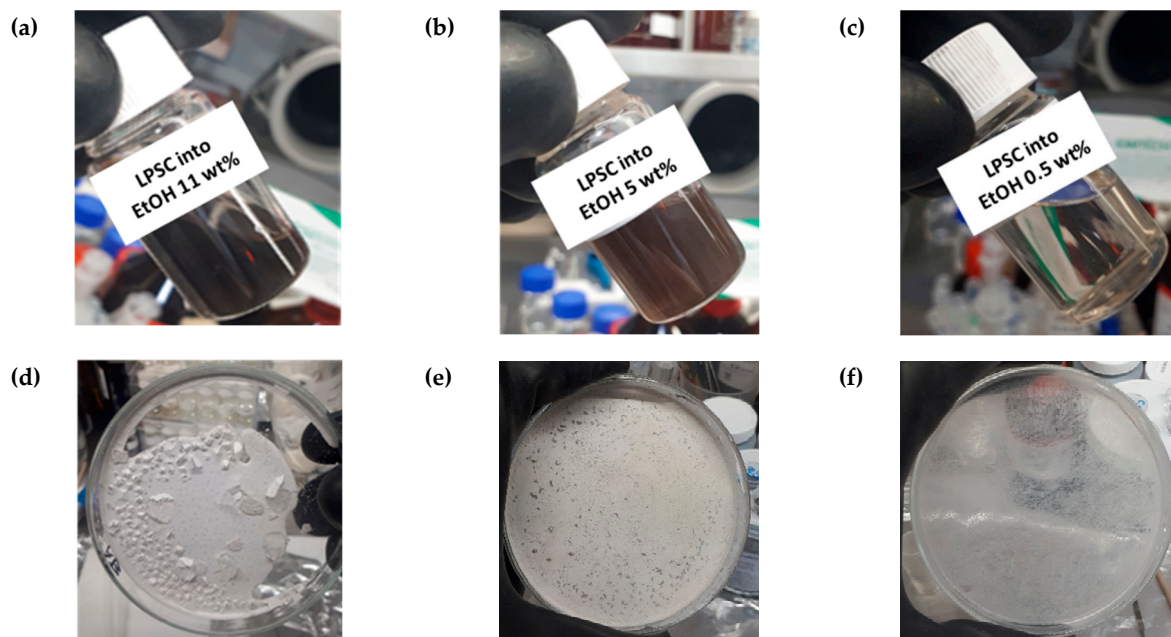

**Figure S2.** Solution of solid electrolyte of  $\text{Li}_6\text{PS}_5\text{Cl}$  into ethanol of (a) 11 wt%, (b) 5 wt%, (c) 0.5 wt%, and (b) solid electrolyte treated with ethanol and depicted after drying at  $180^\circ\text{C}$  for 2 h of (d) 11 wt%, (e) 5 wt%, and (f) 0.5 wt%.

**Table S1.** Solvent and solvent systems that have been used for the infiltration route of NCM cathode materials and selected properties (solvents were used in the given reference for preparation of sulfide-electrolyte solutions).

| Solvent                       | Classification | $T_{\text{bp}}$ ,<br>$^\circ\text{C}$ | Density,<br>$\text{g cm}^{-3}$ | Vapour<br>pressure,<br>$\text{hPa}$ | Dielectric<br>constant | Hazards  | Reference |
|-------------------------------|----------------|---------------------------------------|--------------------------------|-------------------------------------|------------------------|----------|-----------|
| Anisole                       | aprotic, polar | 155                                   | 1.00                           | 4.7 ( $25^\circ\text{C}$ )          | 4.3                    | nontoxic | 1, 2, 3   |
| Ethyl<br>acetate              | aprotic, polar | 77                                    | 0.902                          | 97.32                               | 6.02                   | toxic    | 1, 2, 3   |
| Ethanol                       | protic, polar  | 78                                    | 0.789                          | 44.6                                | 24.5                   | toxic    | 1, 2, 3   |
| Ethanol +<br>Anisole          |                |                                       |                                |                                     |                        |          |           |
| Ethanol +<br>Ethyl<br>acetate |                |                                       |                                |                                     |                        |          |           |

Reference:

[1] Dielectric Constant of Common solvents.xls (washington.edu)

[2] Dielectric Constant Table.pdf (honeywellprocess.com)

[3] Physicochemical properties of solvents (SigmaAldrich.com)

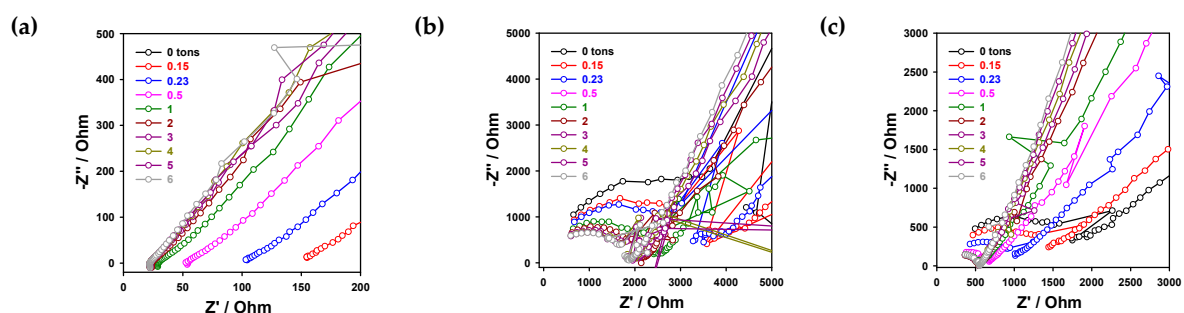

**Figure S3.** Nyquist plots of the (a) pristine used for EIS measurements of  $\text{Li}_6\text{PS}_5\text{Cl}$  samples as well as after treatment with ethanol and subsequent drying at (b) 80°C and (c) 180°C.

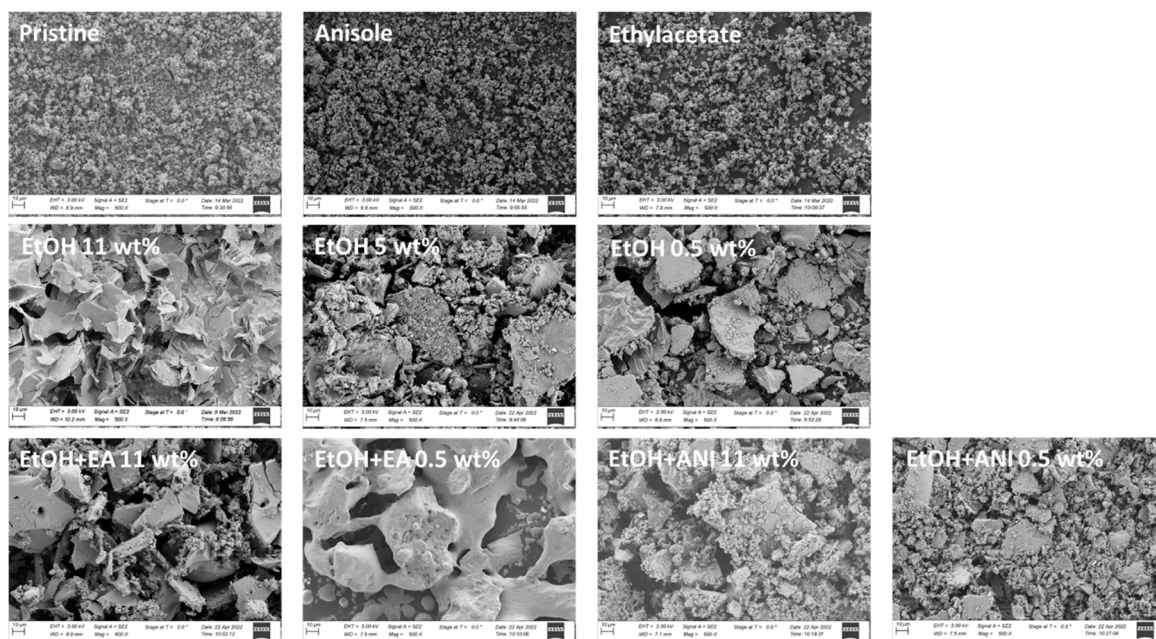

**Figure S4.** SEM images of solid electrolyte treated with different solvents and depicted after drying at 180°C for 2 h.

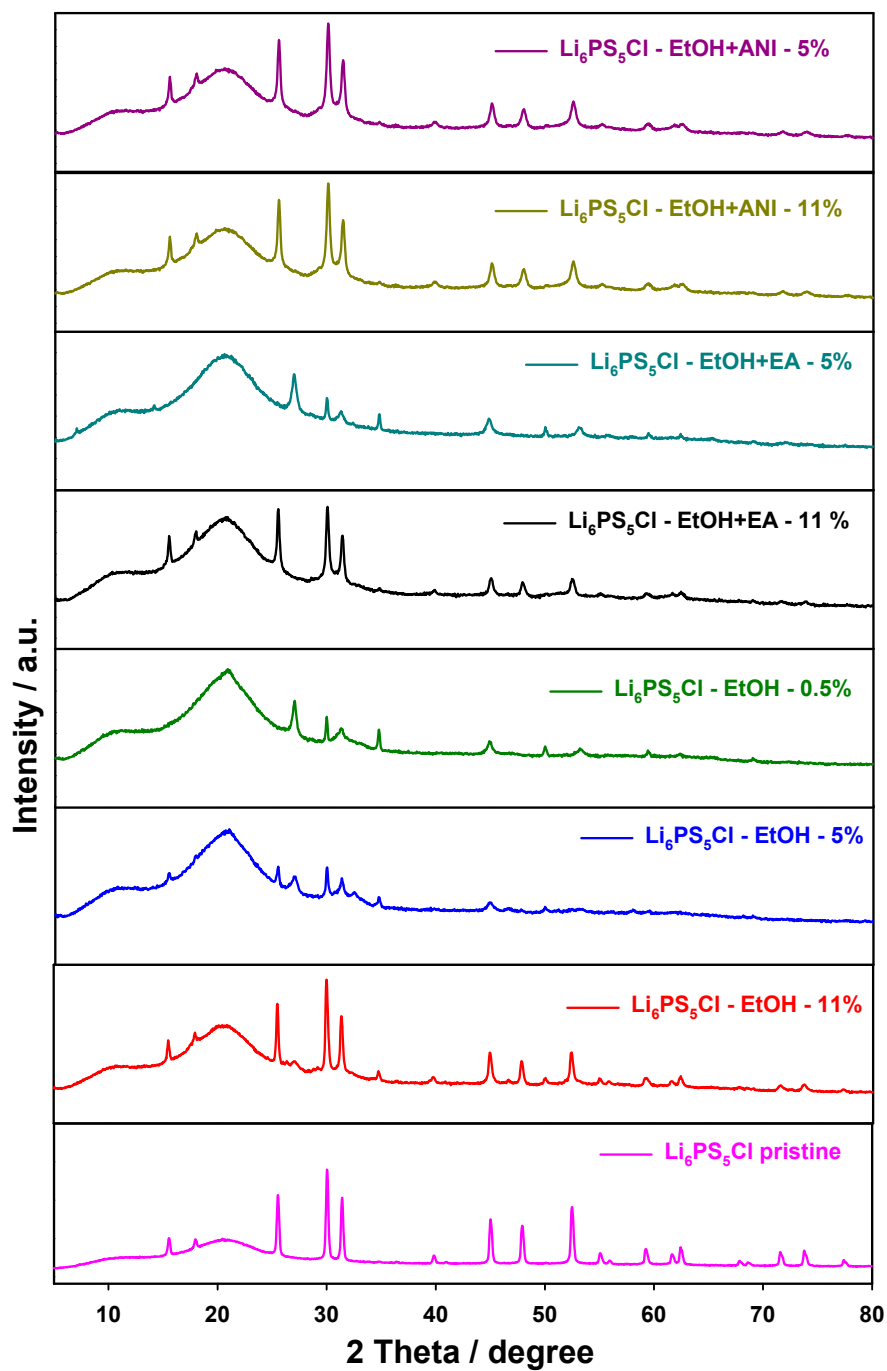

**Figure S5.** XRD patterns of solid electrolyte treated with different solvents and depicted after drying at 180°C for 2 h.



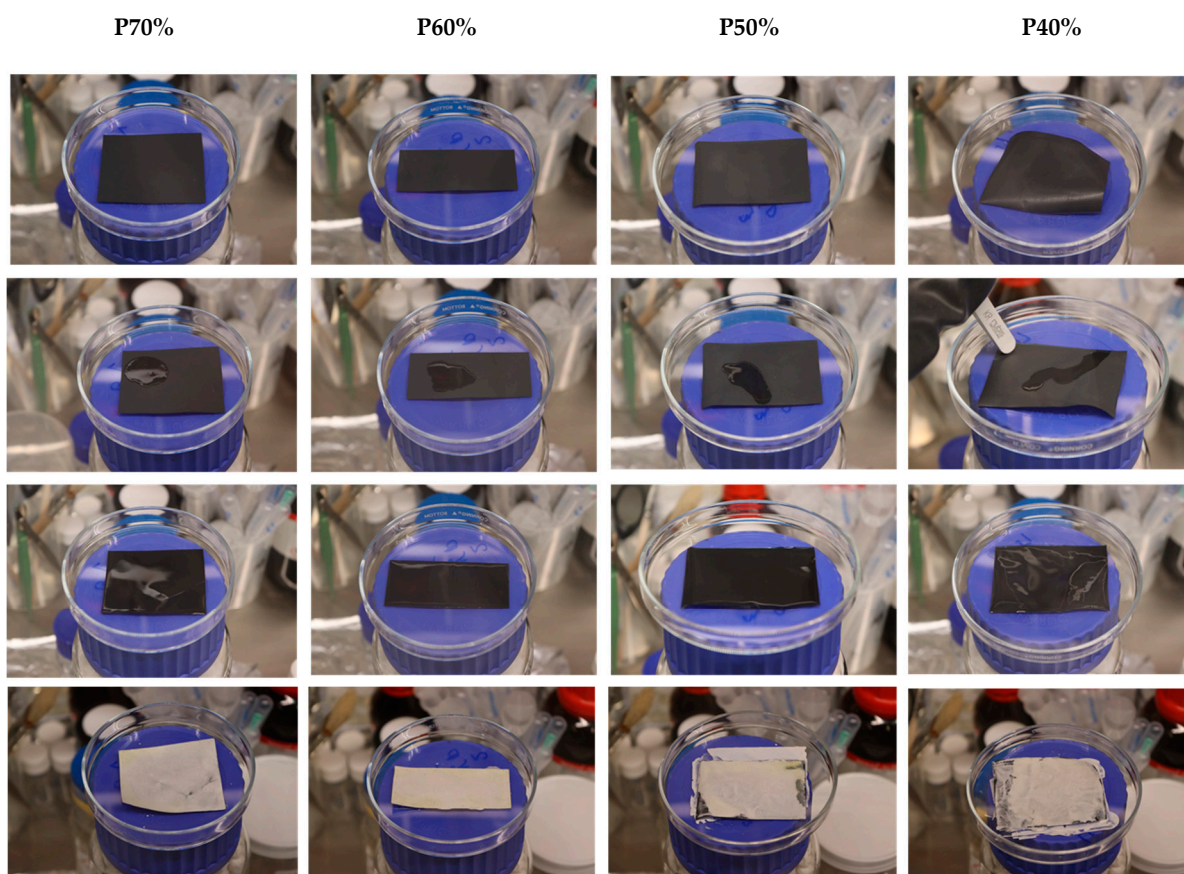

Supplement: s1 [file s1]
